# Supplementary material
Source: PubMed Central journal article supplement (PMC2587150)

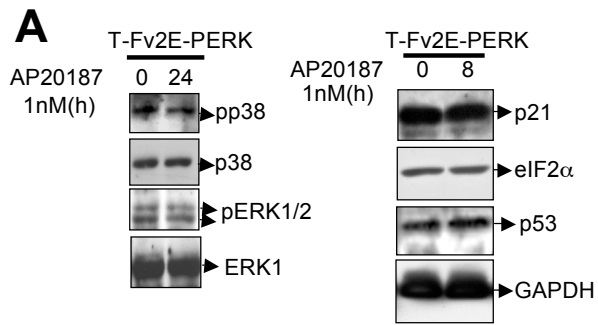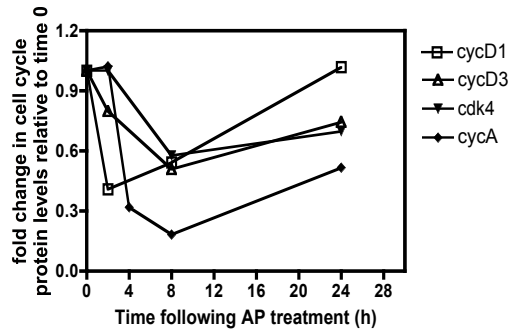

**B**

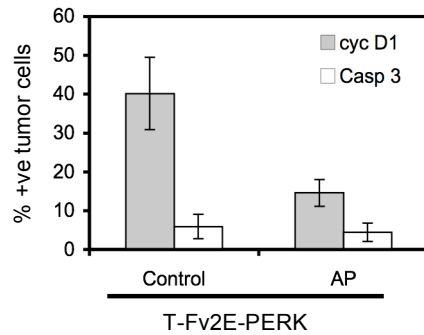

**C**

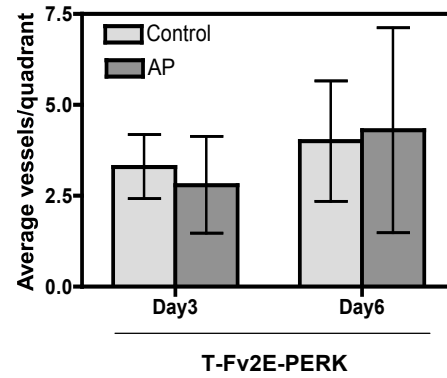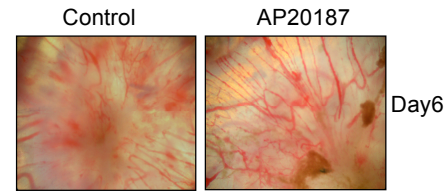

**D**

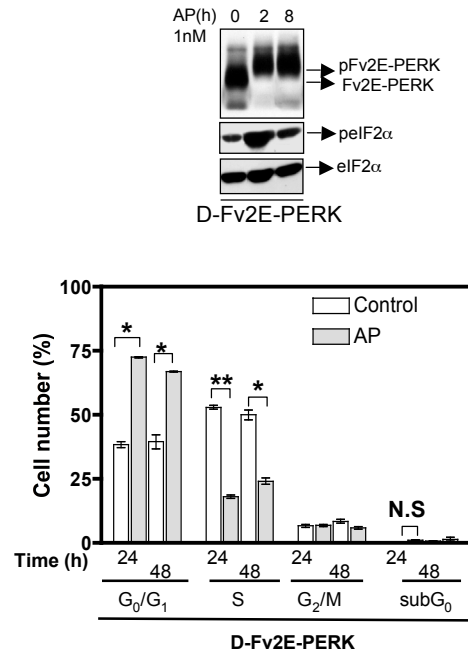

Supplement: NIHMS42442-supplement-suppl_fig2.pdf [file NIHMS42442-supplement-suppl_fig2.pdf]
